# Supplementary material
Source: PubMed Central journal article supplement (PMC4954451)
Supplement: supp_2015-0281_Supplemental_Information.pdf [file supp_2015-0281_Supplemental_Information.pdf]

## **SUPPLEMENTAL MATERIAL – Takehara et al.**

### **Methods**

#### *Isolation and culture of Sca-1-positive cardiac progenitor cells (CPCs) in detail*

Hearts from 8-10-week-old male C57Bl/6 mice were washed with cold phosphate-buffered saline (PBS) to remove blood cells, followed by removal of aortic and pulmonary vessels.

Dissected hearts were minced, treated twice with 0.2% type II collagenase and 0.01% DNase I (Worthington Biochemical Corp, Lakewood, NJ, USA) for 20 min at 37°C. Cells were passed through 70- and 40- $\mu$ m filters to remove debris and size-fractionated in a 30%–70% Percoll gradient to remove mature cardiomyocytes and obtain single-cell suspensions. Cells were cultured in Dulbecco's Modified Eagle Medium/Nutrient Mixture (DMEM/F-12; Gibco/Life Technologies, Carlsbad, CA, USA) supplemented with 10% fetal bovine serum (FBS), penicillin/streptomycin, and recombinant mouse basic fibroblast growth factor (40 ng/mL; R&D Systems, Minneapolis, MN, USA) at 37°C and 5% CO<sub>2</sub>. Expanded cells were cloned and Sca-1-positive CPCs were isolated by magnetic-activated cell sorting (Miltenyi Biotec, San Diego, CA, USA).

#### *Flow cytometry analysis*

Cells were detached with 0.2% TrypLE (Invitrogen, Carlsbad, CA, USA) and resuspended in DMEM with 10% FBS. After centrifugation at 1500 rpm for 5 min, cells were washed with PBS and  $1 \times 10^5$  cells were resuspended in a 100- $\mu$ L solution of PBS containing 1% bovine serum albumin (BSA) and 2 mM ethylenediaminetetraacetic acid (FACS solution). Cells were then incubated with 1  $\mu$ L fluorescein isothiocyanate (FITC)- or phycoerythrin (PE)-conjugated antibody (CD11b-FITC, CD29-FITC, CD45-FITC, vascular cell adhesion molecule-FITC, CD105-FITC,

CD90-FITC, CD31-FITC or c-kit-PE; BD BioLab, Franklin Lakes, NJ, USA) in the dark at 4°C for 10 min. After washing twice with FACS solution, cells were resuspended in 400 µL FACS solution and analyzed on a FACSCalibur instrument (BD Biosciences).

#### *Induction of cardiac differentiation in CPCs*

CPCs, control-CPCs, and APE1-CPCs were seeded in a Matrigel Matrix Growth Factor-Reduced coated dish (BD Biosciences) and cultured for 14 days in Roswell Park Memorial Institute medium containing 2% B27 supplement (Gibco/Life Technologies) and penicillin/streptomycin. Cardiac differentiation was induced by adding activin A (100 ng/mL) and bone morphogenetic protein 4 (10 ng/mL) to the culture medium on day 1 and days 2–5, respectively.

#### *Isolation and culture of rat neonatal ventricular myocytes (NRVMs)*

Hearts from neonatal rats were washed with cold PBS to remove blood cells, and large vessels and atria were removed. The tissue was minced and treated four times with 0.1% type II collagenase for 10 min at 37°C. Cells were size-fractionated in a 45%–65% Percoll gradient to obtain a pure cardiomyocyte population. Cells (NRVMs) were purified (80-90%) by pre-plate method twice to remove the cardiac fibroblasts. Cells were seeded on collagen-coated two-chambered slides ( $1.5 \times 10^5$  cells/19×19mm cover slide well.) in DMEM/F-12 supplemented with 5% fetal calf serum and penicillin/streptomycin at 37°C and 5% CO<sub>2</sub>. The following day, the culture medium was replaced with DMEM/F-12 supplemented with 0.1% BSA, 30 mM HEPES (pH 7.5), and 1× insulin-transferrin-selenium (Gibco/Life Technologies). NRVMs were co-cultured with  $5.0 \times 10^4$  control-CPCs or APE1-CPCs.

#### *Echocardiography*

Mice were divided into groups using a random number table after the surgery and transthoracic echocardiography was performed to evaluate heart function 1, 7, and 28 days after cell transplantation using a Vevo 660 system (VisualSonics, Toronto, Canada). B- and M-mode images of hearts were recorded from the parasternal short axis view. Intraventricular septum and posterior wall thickness as well as left ventricular end-diastolic and end-systolic dimensions (LVDD and LVDs, respectively) were measured from the average of two short axis images at the mid-portion level. Indices of LV systolic function, including LV fractional shortening (LVFS) and LV ejection fraction (LVEF) were calculated with the following formulae:  $LVFS = [(LVDD - LVDs)/LVDD] \times 100\%$ ; and  $LVEF = [(LVEDV - LVESV)/LVEDV] \times 100\%$ , where LVEDV and LVESV are LV end-diastolic and -systolic diameters, respectively, and  $V = 7D^3/(2.4 + D)$ .

#### Endothelial Tubing Assay

HUVECs were cultured in EBM-2 (Lonza, Basel, Switzerland) medium with 10% FBS, penicillin/straeptomycin, and vascular endothelial growth factor (10 ng/mL; Peprotech, Rocky Hill, NJ, USA). BD Matrigel Matrix Growth Factor Reduced (BD Biosciences) was added (45 $\mu$ L) to each well of a 96-well plate and incubated for 1 h at 37°C. HUVECs were suspended by supernatant medium (EBM-2 medium with 2% FBS) of Ct-CPC or APE1-CPC and reseeded on Matrigel-coated 96 well cell culture plate ( $1.0 \times 10^4$  cells/well). Cells were incubated for O/N at 37 °C and viewed using a microscope. Total tubing length was calculated using Image-J software (National Institutes of Health, Bethesda, MD, USA).

#### *Angiogenesis ELISA assay*

Control-CPCs and APE1-CPCs were grown in 12-well cell culture plate. The culture medium of confluent CPCs was replaced to 700  $\mu$ L of serum free media with 200 $\mu$ M of hydrogen

peroxide. After a 4 h incubation, the mouse VEGF and FGF basic concentration in each culture supernatant was determined using ELISA Kit (Abcam, Cambridge, UK). The level of fluorescence was calculated with a Multidkan™ FC Microplate Photometer (Thermo Fisher Scientific).

### Supplemental Figures

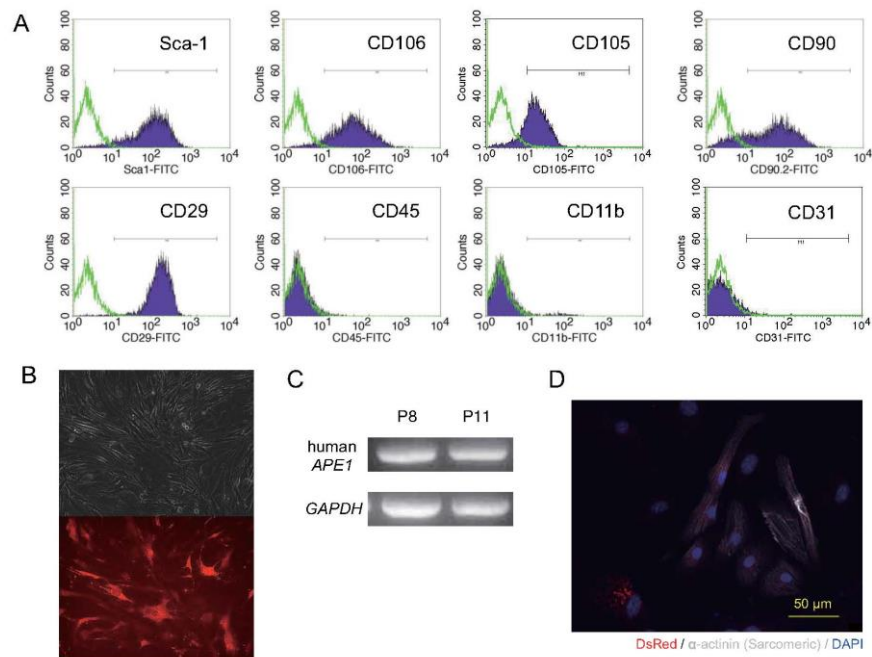

Supplemental Figure 1

**Figure S1. Characteristics of Sca-1-positive CPCs and APE1 overexpressing CPCs**

**A**, Analysis of cell surface marker expression in Sca1-positive CPCs. Sorted cells were positive for Sca-1 (94.3%), cluster of differentiation (CD) 29 (99.4%), CD90 (59.9%), CD105 (79.7%), and vascular cell adhesion molecule (94.8%) and negative for CD11b (3.28%), CD31 (2.1%), CD45 (1.26%), and c-kit (3.07%). **B**, Micrographs of DsRed-expressing CPCs isolated by flow cytometry. CPCs were labeled with DsRed [red]. Image magnification = 40×, **C**, Exogenous human APE1 levels at passage 8 and passage 11 as determined by RT-PCR. **D**, Micrographs of CPCs and NRVMs after 7 days of co-culturing. CPCs were labeled with DsRed [red]. Cardiomyocytes were labeled with an antibody against cardiac  $\alpha$ -sarcomeric actinin [white]. Nuclei were stained with 4', 6-diamidino-2-phenylindole [blue]. Undifferentiated CPCs = red. Differentiated CPCs = merged image of cardiac  $\alpha$ -sarcomeric actinin [white] and DsRed [red].

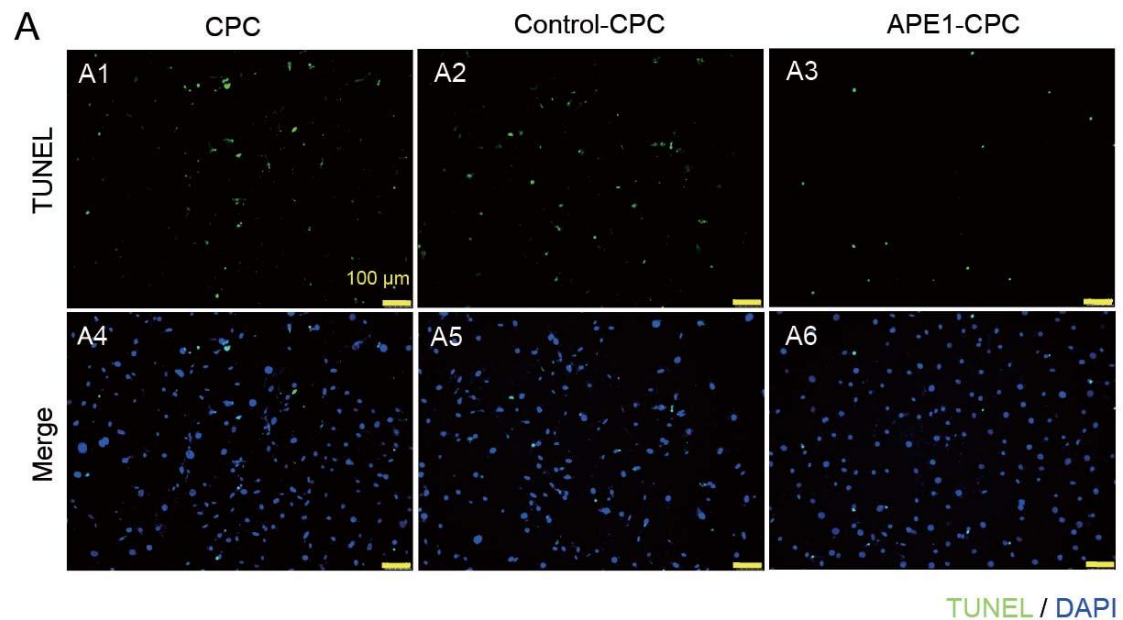

### Supplemental Figure 2

**FigureS2. H<sub>2</sub>O<sub>2</sub>-induced the ROS production and apoptosis in CPCs.** Representative images of TUNEL-positive cells (green; A1–A3); nuclei were stained with 4', 6-diamidino-2-phenylindole (blue; A4–A6). CPC; CPC transferred without any genes, control-CPC; CPC transferred with DsRed gene, APE1-CPC; CPC transferred with APE1-DsRed gene.

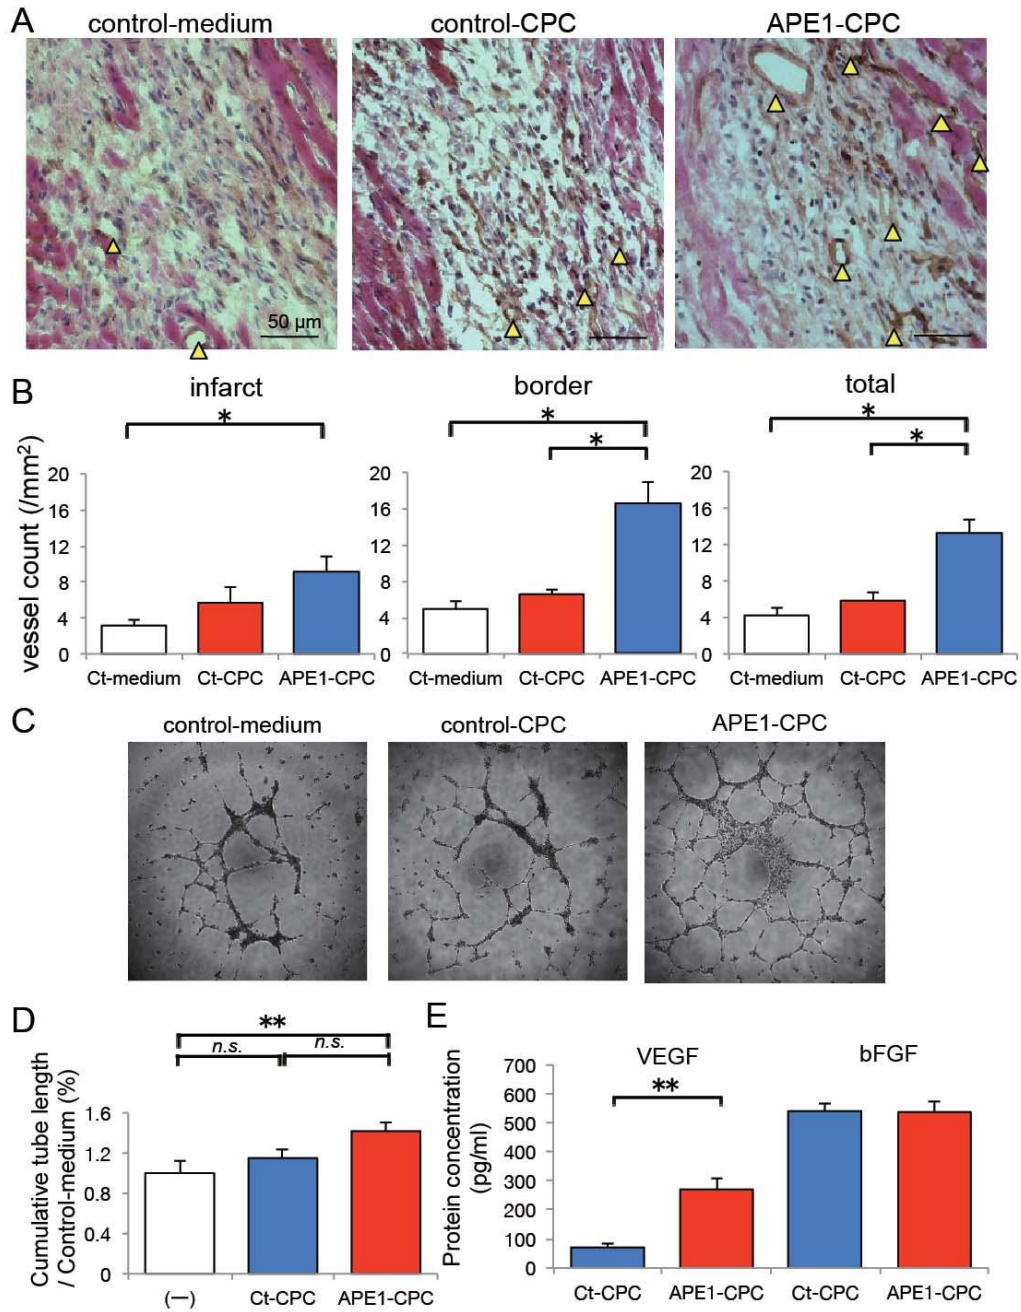

Supplemental Figure 3

**Figure S3. Vascularization in host ischemic heart 7 days post-MI.**

**A**, Images of cardiac tissue sections (hematoxylin and eosin staining) labeled for CD31 expression (brown) in the ischemic area 7 days post-surgery. Yellow arrowheads indicate CD31-positive vessels (capillary structure with brown [3, 3-Diaminobenzidine: DAB substrate] staining). Image magnification = 20×, **B**, Number of CD31-positive vessels in the total ischemic area and border and infarct areas (n = 6 per group). **C**, Representable image of a tubule formation assay by exposure of CPC conditioned-medium in vitro. Image magnification = 4×, **D**, Cumulative tube length of HUVEC in control medium, control- and APE1-CPC supernatant (n=7 per group). **E**, Angiogenesis ELISA assay in control-CPC and APE1-CPC (n=6 respectively). VEGF; vascular endothelial growth factor, bFGF; basic fibroblast growth factor, blank bar; control(Ct)-medium, blue bar; control(Ct)-CPC, red bar; APE1-CPC, \*p < 0.05, \*\*p < 0.01.



## Supplemental Table

Table.S1 protein array analysis in control-CPC vs APE1-CPC

| <b>protein/actin</b>       | <b>control-CPC</b> | <b>APE1-CPC</b> | <b>APE1-CPC/control-CPC</b> |
|----------------------------|--------------------|-----------------|-----------------------------|
| TAK1                       | 3.60               | 4.46            | 1.24                        |
| Bad                        | 1.64               | 1.39            | 0.85                        |
| Akt                        | 1.45               | 1.45            | 1.00                        |
| ERK                        | 1.54               | 1.38            | 0.90                        |
| p38MAPK                    | 1.15               | 1.13            | 0.98                        |
| I $\kappa$ B $\alpha$      | 1.81               | 1.70            | 0.94                        |
| PARP                       | N/A                | N/A             | N/A                         |
| I $\kappa$ B $\alpha$ phos | 1.06               | 1.06            | 1.00                        |
| HSP27                      | 1.18               | 1.26            | 1.07                        |
| Smad2                      | 1.15               | 1.18            | 1.03                        |
| p53                        | N/A                | N/A             | N/A                         |
| SAPK/JNK                   | 1.42               | 1.32            | 0.93                        |
| Casp3                      | N/A                | N/A             | N/A                         |
| Casp7                      | N/A                | N/A             | N/A                         |
| Chk1                       | 1.18               | 1.14            | 0.97                        |
| Chk2                       | 1.13               | 1.07            | 0.94                        |
| eIF2 $\alpha$              | N/A                | N/A             | N/A                         |
| Survivin                   | N/A                | N/A             | N/A                         |
